1        **RAG1 and RAG2 Non-core Regions Are Implicated in**  
2        **Leukemogenesis and Off-target V(D)J Recombination in**  
3        **BCR-ABL1-driven B-cell Lineage Lym-phoblastic Leuke-**  
4        **mia**

5  
6        **Xiaozhuo Yu<sup>1\*</sup>, Wen Zhou<sup>1\*</sup>, Xiaodong Chen<sup>1</sup>, Shunyu He<sup>1</sup>, Mengting**  
7        **Qin<sup>1</sup>, Meng Yuan<sup>1</sup>, Yang Wang<sup>1</sup>, Woodvine otieno Odhiambo<sup>1</sup>,**  
8        **Yinsha Miao<sup>2\*\*</sup> and Yanhong Ji<sup>1,2\*\*</sup>**  
9

10        <sup>1</sup>Department of Pathogenic Biology and Immunology. School of Basic Medical Sci-  
11        ences, Xi'an Jiaotong University Health Science Center.

12        <sup>2</sup> Department of Clinical laboratory, Xi'an No. 3 Hospital, the Affiliated Hospital of  
13        Northwest University.

14        \*Xiaozhuo Yu and Wen Zhou contributed equally to this work as co-first author

15        \*\*Correspondences:

16        Yanhong Ji (jiyanhong@xjtu.edu.cn), Yinsha Miao (miaoyinsha@med.nwu.edu.cn),  
17

18        **Running title:** RAG's Non-core Regions Suppress Leukemogenesis and Off-target  
19        V(D)J Recombination

20

21        **Key words:** RAG, Non-core regions, Off-target V(D)J recombination, *BCR-ABL 1*<sup>+</sup> B-  
22        ALL, Genomic stability

23

## 24 **Abstract**

25 The evolutionary conservation of non-core RAG regions suggests significant roles  
26 that might involve quantitative or qualitative alterations in RAG activity. Off-target  
27 V(D)J recombination contributes to lymphomagenesis and is exacerbated by RAG2'  
28 C-terminus absence in *Tp53<sup>-/-</sup>* mice thymic lymphomas. However, the genomic  
29 stability effects of non-core regions from both cRAG1 and cRAG2 in *BCR-ABL1<sup>+</sup>* B-  
30 lymphoblastic leukemia (*BCR-ABL1<sup>+</sup>* B-ALL), the characteristics, and mechanisms of  
31 non-core regions in suppressing off-target V(D)J recombination remains unclear.  
32 Here, we established three mouse models of *BCR-ABL1<sup>+</sup>* B-ALL in mice expressing  
33 full-length RAG (fRAG), core RAG1 (cRAG1), and core RAG2 (cRAG2). The cRAG  
34 (cRAG1 and cRAG2) leukemia cells exhibited greater malignant tumor characteristics  
35 compared to fRAG cells. Additionally, cRAG cells showed higher frequency of off-  
36 target V(D)J recombination and oncogenic mutations than fRAG. We also revealed  
37 decreased RAG cleavage accuracy in cRAG cells and a smaller recombinant size in  
38 cRAG1 cells, which could potentially exacerbate off-target V(D)J recombination in  
39 cRAG cells. In conclusion, these findings indicate that the non-core RAG regions,  
40 particularly the non-core region of RAG1, play a significant role in preserving V(D)J  
41 recombination precision and genomic stability in *BCR-ABL1<sup>+</sup>* B-ALL.  
42

## 43 Introduction

44 V(D)J recombination serves as the central process for early lymphocyte development  
45 and generates diversity in antigen receptors. This process involves the double-strand  
46 DNA breaks of gene segments by the V(D)J recombinase, including RAG1 and  
47 RAG2. RAG recognizes conserved recombination signal sequences (RSSs) posi-  
48 tioned adjacent to V, D, and J gene segments. A bona fide RSS contains a conserved  
49 palindromic heptamer (consensus 5'-CACAGTG) and A-rich nonamer (consensus 5'-  
50 ACAAAAACC) separated by a degenerate spacer of either 12 or 23 base pairs  
51 (**Hirokawa, et al.,2020; Schatz and Ji,2011**). The process of efficient recombination  
52 is contingent upon the presence of recombination signal sequences (RSSs) with dif-  
53 fering spacer lengths, as dictated by the "12/23 rule" (**Banerjee and Schatz,2014;**  
54 **Eastman, et al.,1996; Shi, et al.,2020**). Following cleavage, the DNA ends are joined  
55 via non-homologous end joining (NHEJ), resulting in the precise alignment of the two  
56 coding ends and the signal ends (**Rooney, et al.,2004**). V(D)J recombination pro-  
57 motes B cell development, but aberrant V(D)J recombination can lead to precursor B-  
58 cell malignancies through RAG mediated off-target effects (**Mendes, et al.,2014;**  
59 **Onozawa and Aplan,2012; Thomson, et al.,2020**).

60 The regulation of RAG expression and activity is multifactorial, serving to ensure  
61 V(D)J recombination and B cell development (**Gan, et al.,2021; Kumari, et al.,2021**).  
62 The RAGs consist of core and non-core region. Although non-core regions of  
63 RAG1/2 are not strictly required for V(D)J recombination, the evolutionarily con-  
64 served non-core RAG regions indicate their potential significance in vivo that may  
65 involve quantitative or qualitative modifications in RAG activity and expression  
66 (**Braams, et al.,2023; Curry and Schlissel,2008; Liu, et al.,2022; Liu, et al.,2022;**  
67 **Sekiguchi, et al.,2001**). Specifically, the non-core RAG2 region (amino acids 384–  
68 527 of 527 residues) contains a plant homeodomain (PHD) that can recognize his-  
69 tone H3K4 trimethylation, as well as a T490 locus that mediates a cell cycle-  
70 regulated protein degradation signal in proliferated pre-B cells stage (**Liu, et al.,2007;**

71 **Matthews, et al.,2007**). Failure to degrade RAG2 during the S stage poses a threat  
72 to the genome (**Zhang, et al.,2011**). Moreover, the off-target V(D)J recombination  
73 frequency is significantly higher when RAG2 is C-terminally truncated, thereby estab-  
74 lishing a mechanistic connection between the PHD domain, H3K4me3-modified  
75 chromatin, and the suppression of off-target V(D)J recombination (**Lu, et al.,2015**;  
76 **Mijušković, et al.,2015**). The RAG1' non-core region (amino acids1–383 of 1040  
77 residues) has been identified as a RAG1 regulator. While the core RAG1 maintains  
78 its catalytic activity, it's in vivo recombination efficiency and fidelity are reduced in  
79 comparison to the full-length RAG1 (fRAG1). In addition, the RAG1 binding to the  
80 genome is more indiscriminate (**Beilinson, et al.,2021**; **Sadofsky, et al.,1993**). The  
81 N-terminal domain (NTD), which is evolutionarily conserved, is predicted to contain  
82 multiple zinc-binding motifs, including a Really Interesting New Gene (RING) domain  
83 (aa 287 to 351) that can ubiquitylate various targets, including RAG1 itself (**Deng, et**  
84 **al.,2015**).. Furthermore, NTD contains a specific region (amino acids 1 to 215) that  
85 facilitates interaction with DCAF1, leading to the degradation of RAG1 in a CRL4-  
86 dependent manner (**Schabla, et al.,2018**). Additionally, the NTD plays a role in  
87 chromatin binding and the genomic targeting of the RAG complex (**Schatz and**  
88 **Swanson,2011**). Despite increased evidence emphasizing the significance of non-  
89 core RAG regions, particularly RAG1's non-core region, the function of non-core  
90 RAG regions in off-target V(D)J recombination and the underlying mechanistic basis  
91 have not been fully clarified.

92 Typically, genomic DNA is safeguarded against inappropriate RAG cleavage by  
93 the inaccessibility of cryptic RSSs (cRSSs), which are estimated to occur once per  
94 600 base pairs (**Teng, et al.,2015**). However, recent research has demonstrated that  
95 epigenetic reprogramming in cancer can result in heritable alterations in gene ex-  
96 pression, including the accessibility of cRSSs (**Becker, et al.,2020**; **Fatma, et**  
97 **al.,2022**; **Goel, et al.,2022**; **Khoshchehreh, et al.,2019**). We selected the *BCR-*  
98 *ABL1*<sup>+</sup> B-ALL model, which is characterized by ongoing V(D)J recombinase activity  
99 and *BCR-ABL1* gene rearrangement in pre-B leukemic cells (**Schjerven, et al.,2017**;

100 **Wong and Witte,2004**). The genome structural variations (SVs) analysis was con-  
101 ducted on leukemic cells from *fRAG*, *cRAG1*, and *cRAG2*, *BCR-ABL1*<sup>+</sup> B-ALL mice to  
102 examine the involvement of non-core RAG regions in off-target V(D)J recombination  
103 events. The non-core domain deletion in both *RAG1* and *RAG2* led to accelerated  
104 leukemia onset and progression, as well as an increased off-target V(D)J recombina-  
105 tion. Our analysis showed a reduction in RAG cleavage accuracy in *cRAG* cells and  
106 a decrease in recombinant size in *cRAG1* cells, which may be responsible for the in-  
107 creased off-target V(D)J recombination in *cRAG* leukemia cells. In conclusion, our  
108 results highlight the potential importance of the non-core RAG region, particularly  
109 *RAG1*'s non-core region, in maintaining accuracy of V(D)J recombination and ge-  
110 nomic stability in *BCR-ABL1*<sup>+</sup> B-ALL.

## 111 **Results**

### 112 **cRAG give more aggressive leukemia in a mouse model of** 113 ***BCR-ABL1*<sup>+</sup> B-ALL**

114 In order to assess the impact of RAG activity on the clonal evolution of *BCR-ABL1*<sup>+</sup>  
115 B-ALL through a genetic experiment, we utilized bone marrow transplantation (BMT)  
116 to compare disease progression in *fRAG*, *cRAG1*, and *cRAG2* *BCR-ABL1*<sup>+</sup> B-ALL  
117 (**Schjerven, et al.,2017; Wong and Witte,2004**). Bone marrow cells transduced with  
118 a *BCR-ABL1*/GFP retrovirus were administered into syngeneic lethally irradiated  
119 mice, and CD19<sup>+</sup> B cell leukemia developed within 30-80 days (Figure 1A, Supple-  
120 mentary Figure 1). Western blotting results confirmed equivalent transduction effi-  
121 ciencies of the retroviral *BCR-ABL1* in all three cohorts (Supplementary Figure 2A).  
122 To investigate potential variances in leukemia outcome across different genomic  
123 backgrounds, we employed Mantel-Cox analysis to evaluate survival rates in *fRAG*,  
124 *cRAG1*, or *cRAG2* mice transplanted with *BCR-ABL1*-transformed bone marrow cells.  
125 Our results show that, during the primary transplant phase, *BCR-ABL1*<sup>+</sup> B-ALL mice  
126 expressing *cRAG1* or *cRAG2* demonstrated lower survival rates compared to their

127 counterparts with fRAG (median 74.5 days versus 39 or 57 days,  $P < 0.0425$ , Figure  
128 1A). This survival rates discrepancy was also observed during the secondary trans-  
129 plant phase, wherein leukemic cells were extracted from the spleens of primary recipi-  
130 ents and subsequently purified via GFP<sup>+</sup> cell sorting. A total of  $10^5$ ,  $10^4$  and  $10^3$  GFP<sup>+</sup>  
131 leukemic cells that originated from fRAG, cRAG1, or cRAG2 leukemic mice were  
132 transplanted into corresponding non-irradiated immunocompetent syngeneic recipi-  
133 ents (survival days fRAG, 11-26 days, cRAG1, 10-16 days, cRAG2, 11-21 days, Sup-  
134 plementary Figure 2B). Additionally, the cRAG mice exhibited significantly higher leu-  
135 kemia burdens in the peripheral blood, bone marrow, and spleen compared to the  
136 fRAG mice (Figure 1B-D). To elucidate the cellular mechanisms driving the acceler-  
137 ated proliferation observed in cRAG *BCR-ABL1*<sup>+</sup> B-ALL, flow cytometry analyses  
138 were conducted to evaluate cell cycle dynamics and apoptotic activity. Results re-  
139 vealed a higher fraction of cRAG *BCR-ABL1*<sup>+</sup> B-ALL cells residing in the S/G2-M  
140 phase of the cell cycle compared to their fRAG counterparts (Figure 1E). Additionally,  
141 the enhanced proliferation in cRAG leukemic cells was attributed to a reduction in  
142 apoptosis rates (Supplementary Figure 2C). RNA-seq analysis demonstrated the  
143 changes of cell differentiation and proliferation/apoptotic pathways (Supplementary  
144 Figure 3) These findings indicate that the absence of non-core RAG regions acceler-  
145 ates malignant transformation and leukemic proliferation, leading to a more aggres-  
146 sive disease phenotype in the cRAG *BCR-ABL1*<sup>+</sup> B-ALL mouse model.

## 147 **The loss of non-core RAG regions corresponds to a less ma-** 148 **ture cell surface phenotype but does not impede IgH VDJ re-** 149 **combination**

150 To delineate the developmental stages of B cells from which the leukemic cells origi-  
151 nated, we performed flow cytometry on single cells stained with B cell-specific sur-  
152 face markers. Analysis revealed that 91%-98% of GFP<sup>+</sup> cells in cRAG mice were  
153 CD19<sup>+</sup>BP-1<sup>+</sup>B220<sup>+</sup>CD43<sup>+</sup>, indicating that most leukemic cells were at the large pre-B

154 cell stage (Figure 2A) (**Hardy and Hayakawa,2001**). Conversely, in fRAG leukemic  
155 mice, the distribution was 65% large pre-B cells (GFP<sup>+</sup>CD19<sup>+</sup>BP-1<sup>+</sup>B220<sup>+</sup>CD43<sup>+</sup>) and  
156 35% small pre-B cells (GFP<sup>+</sup>CD19<sup>+</sup>BP-1<sup>+</sup>B220<sup>+</sup>CD43<sup>-</sup>) (Figure 2A). Moreover, ap-  
157 proximately 5% of leukemic cells in fRAG mice expressed  $\mu$ HC, in con-contrast to mini-  
158 mal expression in cRAG leukemic cells. This suggests that fRAG leukemic cells may  
159 differentiate further, associated with an immune phenotype (Figure 2B). *IgH* rear-  
160 rangement initiates with D<sub>H</sub>-J<sub>H</sub> joining in pro-B cells, followed by V<sub>H</sub>-D<sub>H</sub> joining in pro-  
161 B cells, and ultimately, V<sub>L</sub>-J<sub>L</sub> rearrangements occur at the *IgL* loci in small pre-B cells  
162 (**Schatz and Ji,2011**). Genomic PCR analysis of DNA from GFP<sup>+</sup>CD19<sup>+</sup> cells was  
163 utilized to assess V<sub>H</sub>D<sub>H</sub> rearrangement. The results showed a pronounced  
164 oligoclonality in cRAG leukemic cells, with tumors consistently demonstrating rear-  
165 rangements involving a restricted set of V<sub>H</sub> family members. In contrast, fRAG  
166 leukemias displayed significant polyclonality, evidenced by the widespread rear-  
167 rangement of various V<sub>H</sub> family members to all potential J<sub>H</sub>1-3 segments, indicative of  
168 a broader clonal diversity (Supplementary Figure 4). This observation aligns with the  
169 more aggressive leukemia phenotype seen in cRAG *BCR-ABL1*<sup>+</sup> B-ALL mice. Such  
170 oligoclonality in cRAG leukemic cells suggests a selection process driven by BCR-  
171 ABL1-induced leukemia, favoring the emergence of a limited number of dominant  
172 leukemic clones. The absence of non-core RAG regions appears to restrict the diver-  
173 sity of leukemic clones, leading to the formation of oligoclonal tumors.

## 174 **The loss of non-core RAG regions highlights genomic DNA** 175 **damage**

176 The findings indicate that leukemic cells from three types of mice exhibited variable  
177 arrests at the large pre-B cell stage, deviating from normal B cell developmental tra-  
178 jectory. Typically, at this juncture, B cells initiate the degradation of RAG2 via the cy-  
179 clin-dependent kinase cyclinA/Cdk2, leading to a downregulation of RAG activity. It is  
180 therefore crucial to explore the impact of deletions in non-core regions on the ex-

181 pression and functionality of RAG in these leukemic cells. Analysis showed that both  
182 RAG1 (cRAG1) and RAG2 (cRAG2) were present in GFP<sup>+</sup>CD19<sup>+</sup> splenic leukemic  
183 cells from *BCR-ABL1*<sup>+</sup> B-ALL mice across different genetic backgrounds (Figure 3A).  
184 Notably, we observed an upregulation of cRAG1 and cRAG2 in leukemic cells from  
185 cRAG1 or cRAG2 mice compared to those from fRAG mice (Figure 3A, Supplemen-  
186 tary Figure 5A). The in vitro V(D)J recombination assay confirmed that different forms  
187 of RAG exhibited cleavage activity in *BCR-ABL1*<sup>+</sup>B-ALL (Figure 3B and Supplemen-  
188 tary Figure 5B).

189 To examine the potential correlation between aberrant RAG activity and in-  
190 creased DNA double-strand breaks (DSBs), we assessed levels of phosphorylated  
191 H2AX (̳-H2AX), a marker of DSB response, in leukemic cells from fRAG, cRAG1,  
192 and cRAG2 mice (gated on GFP<sup>+</sup>). This evaluation aimed to gauge DNA DSBs and  
193 overall genomic instability. Flow cytometry analysis revealed elevated ̳-H2AX levels  
194 in cRAG1 and cRAG2 leukemic cells compared to those from fRAG, indicating a  
195 more pronounced role of cRAG in mediating somatic structural variants in *BCR-*  
196 *ABL1*<sup>+</sup> B cells. These findings suggest enhanced expression of cRAG1 endonucle-  
197 ases in cRAG1 leukemic cells and increased DNA damage in cells lacking core RAG  
198 regions.

## 199 **Off-target recombination mediated by RAG in *BCR-ABL1*<sup>+</sup> B** 200 **cells**

201 Genome-wide sequencing and analysis were performed to compare somatic struc-  
202 tural variants (SVs) in *BCR-ABL1*<sup>+</sup> B cells derived from fRAG, cRAG1 and cRAG2  
203 mice. The leukemic cells were sequenced with an average coverage of 25x (Sup-  
204 plementary Table 1). The SVs generated by RAG were screened based on two crite-  
205 ria: the presence of a CAC to the right (or GTG to the left) of both breakpoints, and its  
206 occurrence within 21 bp from the breakpoint (*Mijušković, et al., 2015*). Further elabo-  
207 ration on these criteria can be found in Supplementary Figure 6. Consequently, aber-



208 rant V-to-V junctions and V to intergenic regions were encompassed in five validated  
209 abnormal rearrangements at *Ig* loci in cRAG leukemic mice (Supplementary Table 2).  
210 Additionally, seven samples had 24 somatic structural variations, with an average of  
211 3.4 coding region mutations per sample (range of 0-9), which is consistent with the  
212 limited number of acquired somatic mutations observed in hematological cancers  
213 (Figure 4 and Supplementary Table 3). The results of the study demonstrate that  
214 fRAG cells had low SVs (0-1 per sample), cRAG1 cells exhibited higher SVs (6-9 per  
215 sample) while cRAG2 cells had moderate SVs incidence (1-4 per sample) (Figure 4,  
216 Supplementary Table 3). These findings suggest that cRAG may lead to an elevated  
217 off-target recombination, eventually posing a threat to the *BCR-ABL1*<sup>+</sup> B cells ge-  
218 nome.

## 219 **Off-target V(D)J recombination characteristics in *BCR-ABL1*<sup>+</sup> B** 220 **cells**

221 We further examined the characteristics of the identified structural variants (SVs).  
222 Specifically, we analyzed the exon-intron distribution profiles of 41 breakpoints from  
223 24 SVs through genome analysis. The results indicated that 57% of the breakpoints  
224 were located within the gene body, while 43% were enriched in the flanking se-  
225 quences, the majority of which were identified as transcriptional regulatory sequenc-  
226 es (Figure 5A). P and N nucleotides are recognized as distinctive characteristics of  
227 V(D)J recombination (*Repasky, et al.,2004*). RSS-to-RSS and cRSS-to-cRSS re-  
228 combination have P nucleotides lengths of 7 and 9, respectively, and N lengths of 5,  
229 so nucleotide lengths are basically the same during RSS-to-RSS and cRSS-to-cRSS  
230 recombination (Figure 5B). However, the frequency of P and N sequences in RSS-to-  
231 RSS recombination was 50%/50% (P/N), compared to 4%/8% (P/N) in cRSS-to-  
232 cRSS recombination (Figure 5B). This significant reduction in the frequency of P and  
233 N sequences suggests that DNA repair at off-target sites in *BCR-ABL1*<sup>+</sup> B cells di-  
234 verges from the classical V(D)J re-combination repair process.

235 The hybrid joints were notably prevalent in cRAG1 and cRAG2 leukemic cells  
236 (93% and 100%, respectively), suggesting that the non-core regions of RAG may  
237 play a role in inhibiting harmful transposition events (Figure 5C). To evaluate the ef-  
238 fect of deleting non-core RAG regions on the emergence of oncogenic mutations, we  
239 performed a comparative analysis of cancer-related genes across three types of leu-  
240 kemic cells. We found that cRAG1 leukemic cells harbored a significantly higher  
241 number of cancer genes compared to the other groups. This finding corresponds with  
242 the most aggressive leukemia phenotype observed in cRAG1 *BCR-ABL1*<sup>+</sup> B-ALL  
243 mice and associated changes in their transcription profiles.

#### 244 **The non-core regions have effects on RAG cleavage and off-target** 245 **recombination size in *BCR-ABL1*<sup>+</sup> B cells**

246 Sequence logos were employed to visually contrast RSS and cRSSs within *Ig* and  
247 non-*Ig* loci, respectively. Notably, the RSS elements in *Ig* loci displayed a higher simi-  
248 larity to the canonical RSS, especially at critical functional sites. The initial four nu-  
249 cleotides (highlighted) of the canonical heptamer sequence CACAGTG were recog-  
250 nized as the cleavage site for fRAG. Conversely, in leukemic cells, the cleavage site  
251 for cRAG was pinpointed to the first three nucleotides, the CAC trinucleotide, of the  
252 heptamer sequence (Figure 6A). While both motifs (CACA and CAC) align with the  
253 highly conserved segment of the RSS heptamer sequence, differences in the cRSS  
254 sequences across off-target genes in both fRAG and cRAG mice suggest that dele-  
255 tion of RAG's non-core regions broadens the spectrum of off-target substrates in  
256 *BCR-ABL1*<sup>+</sup> B cells.

257 Antigen receptor genes are assembled by large-scale deletions and inversions  
258 (**Teng, et al.,2015**). The off-target recombination size was determined as the DNA  
259 fragment size spanning the two breakpoints. Our analysis demonstrated that both  
260 fRAG and cRAG2 leukemic cells produced off-target recombinations with 100% and  
261 92% of events, respectively, spanning over 10,000 bp in length. In contrast, cRAG1

262 leukemic cells showed only 6% of off-target recombinations exceeding 10,000 bp,  
263 with 48% under 1,000 bp and 46% ranging between 1,000 to 10,000 bp (Figure 6BC).  
264 These findings suggest that the cRAG1 variant primarily facilitates smaller-scale off-  
265 target recombinations in *BCR-ABL1*<sup>+</sup> B cells, highlighting the role of the non-core  
266 RAG1 region in influencing the extent of off-target recombination. The deletion of the  
267 non-core RAG1 region appears to constrict the size of off-target recombination, po-  
268 tentially contributing to the elevated frequency of off-target V(D)J recombination ob-  
269 served in cRAG1 leukemic cells (Figure 6D).

## 270 Discussion

271 In this study, we have demonstrated that non-core region deletion of both RAG1 and  
272 RAG2 leads to accelerated development of leukemia and increased off-target V(D)J  
273 recombination in mice models of *BCR-ABL1*<sup>+</sup> B cells. Furthermore, we report re-  
274 duced cRAG cleavage accuracy and off-target recombination size in cRAG leukemia  
275 cells, which might contribute to exacerbated off-target V(D)J recombination of cRAG  
276 *BCR-ABL1*<sup>+</sup> B cells. These findings suggest that the non-core regions, particularly the  
277 non-core region of RAG1, play a crucial role in maintaining accuracy of V(D)J recom-  
278 bination and genomic stability in *BCR-ABL1*<sup>+</sup> B cells.

279 Our findings suggest that leukemic cells with cRAG regions exhibit increased produc-  
280 tion of hybrid joints, implying that non-core RAG regions might suppress the for-  
281 mation of these hybrid joints in vivo. Post-cleavage synaptic complexes (PSCs),  
282 comprising RAG proteins, coding ends, and RSS ends, are believed to have evolved  
283 to form with optimal conformation and/or stability for conventional coding and RSS  
284 end-joining(**Fugmann, et al.,2000; Libri, et al.,2021**). In contrast, cRAG PSCs could  
285 promote RAG-mediated hybrid joints by facilitating closer proximity of coding and  
286 RSS ends or by increasing PSC stability. It is also conceivable that fRAGs recruit  
287 disassembly/remodeling factors to PSCs, a process that could allow non-homologous  
288 end joining (NHEJ) factors to complete the normal reaction(**Fugmann, et al.,2000**).

289 Conversely, cRAGs may have a diminished recruitment capacity due to changes in  
290 overall conformation or the absence of specific motifs, leading to more unstable  
291 PSCs and a heightened risk of accumulating incomplete hybrid joints (**Raghavan, et**  
292 **al.,2006; Talukder, et al.,2004**). Our data reveal that over 90% of junctions were hy-  
293 brid joints in cRAG leukemic cells, a frequency exceeding that reported in previous  
294 studies. This suggests that deficiencies in the NHEJ pathway could contribute to  
295 chromosomal instability and lymphomagenesis(**Gaymes, et al.,2002; Rassool,2003;**  
296 **Scully, et al.,2019; Wiegmanns, et al.,2021**). Significantly, our analysis uncovered  
297 variations in the NHEJ repair pathway among leukemic cells from different genetic  
298 backgrounds, suggesting a potential aberrant expression of DNA repair pathways in  
299 cRAG leukemic cells (Supplementary Figure 3B). These findings highlight the poten-  
300 tial of cRAG to foster increased hybrid joint formation, especially when a normal  
301 pathway for efficient coding and RSS joining is compromised in an NHEJ-aberrant  
302 context.

303 Our data demonstrates that the deletion of the RAG1 non-core region results in  
304 more severe off-target V(D)J recombination compared to the deletion of the RAG2  
305 non-core region. This observation is supported by the fact that the RAG1 terminus  
306 contains multiple zinc-binding motifs and ubiquitin ligase activity, which are known to  
307 enhance the efficiency of the rearrangement reaction (**Beilinson, et al.,2021; Burn,**  
308 **et al.,2022**). Furthermore, our research reveals that RAG1 expression persists in  
309 *BCR-ABL*<sup>1+</sup> progenitor B cells, and deletion of the non-core region of RAG1 results in  
310 elevated expression of RAG in comparison to fRAG. Consequently, as demonstrated  
311 in this study, cRAG1 from *BCR-ABL*<sup>1+</sup> B leukemic mice is prone to generating off-  
312 target V(D)J recombination. The distinct function of RAG1's non-core region in thymic  
313 lymphomas of *Tp53*<sup>-/-</sup> mice and *BCR-ABL*<sup>1+</sup> B leukemic mice leads to dissimilar off-  
314 target activity of cRAG1 (**Mijušković, et al.,2015**). Therefore, it would be intriguing to  
315 replicate these analyses across various subtypes of ALL to further investigate this  
316 phenomenon.

317 In human *ETV6-RUNX1* ALL, the *ETV6-RUNX1* fusion gene is believed to initi-

318 ate prenatally, yet the disease remains clinically latent until critical secondary events  
319 occur, leading to leukemic transformation-"pre-leukemia to leukemia" (*Mijušković, et*  
320 *al.,2015*). Genomic rearrangement, mediated by aberrant RAG recombinase activity,  
321 is a frequent driver of these secondary events in *ETV6-RUNX1* ALL (*Chen, et*  
322 *al.,2021; Papaemmanuil, et al.,2014*). In contrast, RAG mediated off-target V(D)J  
323 recombination is also observed in *BCR-ABL1*<sup>+</sup> B-ALL. These oncogenic structural  
324 variations can also be considered as secondary events that promote the transition -  
325 "leukemia to aggressive leukemia". The enhancement of *BCR-ABL1*<sup>+</sup> B-ALL deterio-  
326 ration and progression by cRAG in mouse model was consistent with our previous  
327 study that RAG enhances BCR-ABL1 positive leukemic cell growth through its endo-  
328 nuclease activity (*Yuan, et al.,2021*). Additionally, we showed that non-core RAG1  
329 region deletion leads to increased cRAG1 expression and high RAG expression re-  
330 lated to low survival in pediatric acute lymphoid leukemia (Figure 3A and Supplemen-  
331 tary Figure 7). Therefore, more attention should be paid to the non-core RAG region  
332 mutation in *BCR-ABL1*<sup>+</sup> B-ALL for the role of non-core region in leukemia suppres-  
333 sion and off-target V(D)J recombination.

## 334 **Methods**

### 335 **Mice**

336 The C57BL/6 mice were purchased from the Experimental Animal Center of Xi'an  
337 Jiaotong University, while cRAG1 (amino acids 384-1040) and cRAG2 (amino acids  
338 1-383) were obtained from Dr. David G. Schatz (Yale University, New Haven, Con-  
339 necticut, USA). The mice were bred and maintained in a specific pathogen-free (SPF)  
340 environment at the Experimental Animal Center of Xi'an Jiaotong University. All ani-  
341 mal-related procedures were in accordance with the guidelines approved by the Xi'an  
342 Jiaotong University Ethics Committee for Animal Experiments.

## 343 **Generation of Retrovirus Stocks**

344 The pMSCV-BCR-BAL1-IRES-GFP vector is capable of co-expressing the human  
345 BCR-ABL1 fusion protein and green fluorescence protein (GFP), while the pMSCV-  
346 GFP vector serves as a negative control by solely expressing GFP. To produce viral  
347 particles, 293T cells were transfected with either the MSCV-BCR-BAL1-IRES-GFP or  
348 MSCV-GFP vector, along with the packaging vector PKAT2, utilizing the X-  
349 tremeGENE HP DNA Transfection Reagent from Roche (Basel, Switzerland). After  
350 48 hours, the viral supernatants were collected, filtered, and stored at -80°C.

## 351 **Bone Marrow Transduction and Transplantation**

352 Experiments were conducted using mice aged between 6 to 10 weeks. *BCR-ABL1*<sup>+</sup>  
353 B-ALL murine model was induced by utilizing marrow from donor mice who had not  
354 undergone 5-FU treatment. The donor mice were euthanized through CO<sub>2</sub> asphyxia-  
355 tion, and the bone marrow was harvested by flushing the femur and tibia with a sy-  
356 ringe and 26-gauge needle. Erythrocytes were not removed, and  $1 \times 10^6$  cells per  
357 well were plated in six-well plates. A single round of co-sedimentation with retroviral  
358 stock was performed in medium containing 5% WEHI-3B-conditioned medium and 10  
359 ng/mL IL-7 (Peprotech, USA). After transduction, cells were either transplanted into  
360 syngeneic female recipient mice ( $1 \times 10^6$  cells each) that had been lethally irradiated  
361 ( $2 \times 450$  cGy), or cultured in RPMI-1640 (Hyclone, Logan, UT) medium supplement-  
362 ed with 10% fetal calf serum (Hyclone), 200 mmol/L L-glutamine, 50 mmol/L 2-  
363 mercaptoethanol (Sigma, St Louis, MO), and 1.0 mg/mL penicillin/streptomycin  
364 (Hyclone). Subsequently, recipient mice were monitored daily for indications of mor-  
365 bidity, weight loss, failure to thrive, and splenomegaly. Weekly assessment of periph-  
366 eral blood GFP percentage was done using FACS analysis of tail vein blood. Hema-  
367 topoietic tissues and cells were utilized for histopathology, in vitro culture, FACS  
368 analysis, secondary transplantation, genomic DNA preparation, protein lysate prepa-  
369 ration, or lineage analysis, contingent upon the unique characteristics of mice under

370 study.

## 371 **Secondary Transplants**

372 Thawed BM cells were sorted using a BD FACS Aria II (Becton Dickinson, San Jose  
373 California, USA). GFP positive leukemic cells ( $1 \times 10^6$ ,  $1 \times 10^5$ ,  $1 \times 10^4$ , and  $1 \times 10^3$ ) were  
374 then resuspended in 0.4 mL Hank's Balanced Salt Solution (HBSS) and intravenous-  
375 ly administered to unirradiated syngeneic mice.

## 376 **Flow cytometry analysis and sorting**

377 Bone marrow, spleen cells, and peripheral blood were harvested from leukemic mice.  
378 Red blood cells were eliminated using NH<sub>4</sub>Cl RBC lysis buffer, and the remaining  
379 nucleated cells were washed with cold PBS. In order to conduct in vitro cell surface  
380 receptor staining,  $1 \times 10^6$  cells were subjected to antibody staining for 20 minutes at  
381 4°C in 1×PBS containing 3% BSA. Cells were then washed with 1×PBS and ana-  
382 lyzed using a CytoFLEX Flow Cytometer (Beckman Coulter, Miami, FL) or sorted on  
383 a BD FACS Aria II. Apoptosis was analysed by resuspending the cells in Binding  
384 Buffer (BD Biosciences, Baltimore, MD, USA), and subsequent labeling with anti-  
385 annexin V-AF647 antibody (BD Biosciences) and propidium iodide (BD Biosciences)  
386 for 15 minutes at room temperature. The lineage analysis was performed using the  
387 following antibodies, which were purchased from BD Biosciences: anti-BP-1-PerCP-  
388 Cy7, anti-CD19-PerCP-CyTM<sup>5.5</sup>, anti-CD43-PE, anti-B220-APC, and anti- $\mu$ HC-APC.

## 389 **BrdU incorporation and analysis**

390 Cells obtained from primary leukemic mice were cultured in six-well plates containing  
391 RPMI-1640 medium supplemented with 10% FBS and 50  $\mu$ g/mL BrdU. After incuba-  
392 tion at 37°C for 30 minutes, the cells were harvested and intranuclearly stained with  
393 anti-BrdU and 7-AAD antibodies, following the manufacturer's instructions.

## 394 **The in vitro V(D)J recombination assay**

395 The retroviral recombination substrate pINV-12/23 was introduced into primary leuke-  
396 mic cells utilizing X-treme GENE HP DNA Transfection Reagent (Roche).  
397 Recombination efficiency of pINV-12/23 was evaluated through flow cytometry anal-  
398 ysis for mouse CD90 (mCD90) and hCD4 expression (*Yuan, et al.,2021*).

## 399 **Western blotting analysis**

400 Over  $1 \times 10^6$  leukemic cells were centrifuged and washed with ice-cold PBS. The  
401 cells were then treated with ice-cold RIPA buffer, consisting of 50 mM Tris-HCl (pH  
402 7.4), 0.15 M NaCl, 1% Triton X-100, 0.5% NaDoc, 0.1% sodium dodecyl sulphide  
403 (SDS), 1 mM ethylene diamine tetraacetic acid (EDTA), 1 mM phenylmethane  
404 sulphony fluoride (PMSF) (Amresco), and fresh protease inhibitor cocktail Pepstain A  
405 (Sigma). After sonication using a Bioruptor TMUCD-200 (Diagenode, Seraing, Bel-  
406 gium), the suspension was spined at 14,000 g for 3 minutes at 4°C. The total cell ly-  
407 sate was either utilized immediately or stored at -80°C. Protein concentrations were  
408 determined using DC Protein Assay (Bio-Rad Laboratories, Hercules, California,  
409 USA). Subsequently, the protein samples (20 µg) were incubated with α-RAG1 (mAb  
410 23) and α-RAG2 (mAb 39) antibodies (*Teng, et al.,2015*), with GAPDH serving as  
411 the loading control. The signal was further detected using secondary antibody of goat  
412 anti-rabbit IgG conjugated with horseradish peroxidase (Thermo Scientific, Waltham,  
413 MA). The band signal was developed with Immobilon™ Western Chemiluminescent  
414 HRP substrate (Millipore, Billerica, MA). The band development was analyzed using  
415 GEL-PRO ANALYZER software (Media Cybernetics, Bethesda, MD).

## 416 **Genomic PCR**

417 Genomic PCR was performed in a 20µl reaction containing 50 ng of genomic DNA,  
418 0.2 µm of forward and reverse primer, and 10 µl Premix Ex Taq (TaKaRa, Shiga, Ja-  
419 pan). Amplification conditions were as follows: 94°C for 5 minutes; 35 cycles of 30



420 seconds at 94°C, 30 seconds at 60°C and 1 minutes at 72°C; 72°C for 5 minutes  
421 (BioRad, Hercules, CA). Genomic PCR was performed using the following primers:  
422 D<sub>H</sub>L-5'-GGAATTCGTTTTTGTSAAGGGATCTACTACTGTG-3'; J<sub>H</sub>3-5'-  
423 GTCTAGATTCTCAC  
424 -AAGAGTCCGATAGACCCTGG-3'; V<sub>H</sub>Q52-5'-CGGTACCAGACTGARCATCASCAAG  
425 -GACAAYTCC-3'; V<sub>H</sub>558-5'-CGAGCTCTCCARCACAGCCTWCATGCARCTCARC-3';  
426 V<sub>H</sub>7183-5'-CGGTACCAAGAASAMCCTGTWCCTGCAAATGASC-3'. (**Schlissel, et**  
427 **al., 1991**):

## 428 **RNA-seq library preparation and sequencing**

429 GFP<sup>+</sup>CD19<sup>+</sup> cells were sorted from the spleen of cRAG1 (n=3, 1×10<sup>6</sup> cells /sample),  
430 cRAG2 (n=3, 1×10<sup>6</sup> cells /sample), and fRAG (n=3, 1×10<sup>6</sup> cells /sample) *BCR-ABL* 1<sup>+</sup>  
431 B-ALL mice. Total RNA was extracted using Trizol reagent (Invitrogen, CA, USA) fol-  
432 lowing the manufacturer's guidelines. RNA quantity and purity analysis was done us-  
433 ing Bioanalyzer 2100 and RNA 6000 Nano LabChip Kit (Agilent, CA, USA) with RIN  
434 number >7.0. RNA-seq libraries were prepared by using 200 ng total RNA with  
435 TruSeq RNA sample prep kit (Illumina). Oligo(dT)-enriched mRNAs were fragmented  
436 randomly with fragmentation buffer, followed by first- and second-strand cDNA syn-  
437 thesis. After a series of terminal repair, the double-stranded cDNA library was ob-  
438 tained through PCR enrichment and size selection. cDNA libraries were sequenced  
439 with the Illumina HiSeq 2000 sequencer (Illumina HiSeq 2000 v4 Single-Read 50 bp)  
440 after pooling according to its expected data volume and effective concentration. Two  
441 biological replicates were performed in the RNA-seq analysis. Raw reads were then  
442 aligned to the mouse genome (GRCm38) using Tophat2 RNA-seq alignment soft-  
443 ware, and unique reads were retained to quantify gene expression counts from  
444 Tophat2 alignment files. The differentially expressed mRNAs and genes were select-  
445 ed with log<sub>2</sub> (fold change) >1 or log<sub>2</sub> (fold change) <-1 and with statistical signifi-  
446 cance (p value < 0.05) by R package. Bioinformatic analysis was performed using

447 the OmicStudio tools at <https://www.omicstudio.cn/tool>.

## 448 **Preparation of tumor DNA samples**

449 GFP<sup>+</sup>CD19<sup>+</sup> splenic cells, tail and kidney tissue were obtained from *cRAG1*, *cRAG2*  
450 and *fRAG BCR-ABL1*<sup>+</sup> B-ALL mice, and genomic DNA was extracted using a  
451 TIANamp Genomic DNA Kit (TIANGEN-DP304). Subsequently, paired-end libraries  
452 were constructed from 1 µg of the initial genomic material using the TruSeq DNA v2  
453 Sample Prep Kit (Illumina, #FC-121-2001) as per the manufacturer's instructions.  
454 The size distribution of the libraries was assessed using an Agilent 2100 Bioanalyzer  
455 (Agilent Technologies, #5067-4626), and the DNA concentration was quantified using  
456 a Qubit dsDNA HS Assay Kit (Life Technologies, #Q32851). The Illumina HiSeq 4000  
457 was utilized to sequence the samples, with two to four lanes allocated for sequencing  
458 the tumor and one lane for the control DNA library of the kidney or liver, each with  
459 150 bp paired end reads.

## 460 **Read alignment and structural variant calling**

461 Fastq files were generated using Casava 1.8 (Illumina), and BWA 37 was employed  
462 to align the reads to mm9. PCR duplicates were eliminated using Picard's Mark Du-  
463 plicates tool ([source-forge.net/apps/mediawiki/picard](http://sourceforge.net/apps/mediawiki/picard)). Our custom scripts  
464 (<http://sourceforge.net/projects/svdetection>) were utilized to eliminate BWA-  
465 designated concordant and read pairs with low BWA mapping quality scores.  
466 Intrachromosomal and inter-chromosomal rearrangements were identified using SV  
467 Detect from discordant, quality prefiltered read pairs. The mean insertion size and  
468 standard deviation for this analysis were obtained through Picard's InsertSizeMetrics  
469 tool ([sourceforge.net/apps/mediawiki/picard](http://sourceforge.net/apps/mediawiki/picard)). Tumor-specific structural variants (SVs)  
470 were identified using the manta software  
471 ([https://github.com/Illumina/manta/blob/master/docs/userGuide/README.md#introduc](https://github.com/Illumina/manta/blob/master/docs/userGuide/README.md#introduction)  
472 *tion*).

## 473 **Validation of high confidence off-target candidates**

474 The elimination of non-specific structural mutations from the kidney or tail was nec-  
475 essary for tumor-specific structural variants identification. Subsequently, the method  
476 involving 21-bp CAC-to-breakpoint was employed to filter RAG-mediated off-target  
477 gene. The validation of high confidence off-target candidates was carried out through  
478 PCR. Oligonucleotide primers were designed to hybridize within the "linking" regions  
479 of SV Detect, in the appropriate orientation. The PCR product was subjected to  
480 Sanger sequencing and aligned to the mouse mm9 reference genome using BLAST  
481 (<https://blast.ncbi.nlm.nih.gov/Blast.cgi>).

## 482 **Statistics.**

483 Statistical analysis was conducted using SPSS 20.0 (IBM Corp.) and GraphPad  
484 Prism 6.0 (GraphPad Software). Descriptive statistics were reported as means  $\pm$   
485 standard deviation for continuous variables. Statistical analyses were applied to bio-  
486 logically independent mice or technical replicates for each experiment which was in-  
487 dependently repeated at least three times. The equality of variances was assessed  
488 using Levene's test. Two-group comparisons, multiple group comparisons, and sur-  
489 vival comparisons were performed using independent-samples t-test, one-way anal-  
490 yses of variance (ANOVA) with post hoc Fisher's LSD test, and log-rank Mantel-Cox  
491 analysis, respectively. Kaplan-Meier survival curves were utilized to depict the  
492 changes in survival rate over time. Statistical significance was set at  $P < 0.05$ .

493

## 494 **Disclosure of Potential Conflicts of Interest**

495 The authors declare no potential conflicts of interest.

## 496 **Authors' Contributions**

497 Yanghong Ji: Conceptualization, resources, data curation, funding acquisition, valida-  
498 tion, writing-review, and editing. Xiaozhuo Yu and Wen Zhou: Conceptualization, val-  
499 idation, visualization, methodology, writing-original draft, writing-review, and editing.  
500 Xiaodong Chen: validation, writing-review, and editing. Shunyu He: methodology,  
501 writing-review, and editing. Mengting Qin: writing-review, and editing. Meng Yuan:  
502 validation, writing-review, and editing. Yang Wang: validation, writing-review and edit-  
503 ing. Woodvine otieno Odhiambo: writing-review and editing. YinSha Miao: funding,  
504 validation, writing-review, and editing.

## 505 **Acknowledgments**

506 This study was supported by grants (no. 31170821, no. 31370874 and no. 81670157)  
507 from the National Natural Scientific Foundation of China and by a grant (no. 2016JZ0  
508 -30) from the Natural Scientific Foundation of Shaanxi. The authors would like to  
509 thank Professor Shaoguang Li from the Division of Hematology/Oncology, University  
510 of Massachusetts Medical School, for providing the MSCV-BCR-BAL1-IRES-GFP  
511 construct. The authors would also like to thank Mr. Xiaofei Wang (Xi'an Jiaotong Uni-  
512 versity Health Science Centre) for providing expert technical assistance with cell sort-  
513 ing.  
514

## 515 **References:**

516 Banerjee JK, Schatz DG. 2014. Synapsis alters RAG-mediated nicking at Terb recombination signal  
517 sequences: implications for the “beyond 12/23” rule. *MOL CELL BIOL* **34**:2566-2580.  
518 doi:10.1128/MCB.00411-14  
519 Bateman CM, Colman SM, Chaplin T, Young BD, Eden TO, Bhakta M, Gratias EJ, van Wering ER,  
520 Cazzaniga G, Harrison CJ, Hain R, Ancliff P, Ford AM, Kearney L, Greaves M. 2010. Acquisition of  
521 genome-wide copy number alterations in monozygotic twins with acute lymphoblastic leukemia.  
522 *BLOOD* **115**:3553-3558. doi:10.1182/blood-2009-10-251413  
523 Becker LM, O'Connell JT, Vo AP, Cain MP, Tampe D, Bizarro L, Sugimoto H, McGow AK, Asara  
524 JM, Lovisa S, McAndrews KM, Zielinski R, Lorenzi PL, Zeisberg M, Raza S, LeBleu VS, Kalluri R.

525 2020. Epigenetic Reprogramming of Cancer-Associated Fibroblasts Dereglates Glucose Metabolism  
526 and Facilitates Progression of Breast Cancer. *CELL REP* **31**:107701. doi:10.1016/j.celrep.2020.107701  
527 Beilinson HA, Glynn RA, Yadavalli AD, Xiao J, Corbett E, Saribasak H, Arya R, Miot C,  
528 Bhattacharyya A, Jones JM, Pongubala J, Bassing CH, Schatz DG. 2021. The RAG1 N-terminal region  
529 regulates the efficiency and pathways of synapsis for V(D)J recombination. *J EXP MED*  
530 **218**:doi:10.1084/jem.20210250  
531 Beilinson HA, Glynn RA, Yadavalli AD, Xiao J, Corbett E, Saribasak H, Arya R, Miot C,  
532 Bhattacharyya A, Jones JM, Pongubala J, Bassing CH, Schatz DG. 2021. The RAG1 N-terminal region  
533 regulates the efficiency and pathways of synapsis for V(D)J recombination. *J EXP MED*  
534 **218**:doi:10.1084/jem.20210250  
535 Bhojwani D, Pei D, Sandlund JT, Jeha S, Ribeiro RC, Rubnitz JE, Raimondi SC, Shurtleff S, Onciu M,  
536 Cheng C, Coustan-Smith E, Bowman WP, Howard SC, Metzger ML, Inaba H, Leung W, Evans WE,  
537 Campana D, Relling MV, Pui CH. 2012. ETV6-RUNX1-positive childhood acute lymphoblastic leu-  
538 kemia: improved outcome with contemporary therapy. *LEUKEMIA* **26**:265-270.  
539 doi:10.1038/leu.2011.227  
540 Braams M, Pike-Overzet K, Staal F. 2023. The recombinase activating genes: architects of immune  
541 diversity during lymphocyte development. *FRONT IMMUNOL* **14**:1210818.  
542 doi:10.3389/fimmu.2023.1210818  
543 Burn TN, Miot C, Gordon SM, Culbertson EJ, Diamond T, Kreiger PA, Hayer KE, Bhattacharyya A,  
544 Jones JM, Bassing CH, Behrens EM. 2022. The RAG1 Ubiquitin Ligase Domain Stimulates Recombi-  
545 nation of TCR $\beta$  and TCR $\alpha$  Genes and Influences Development of  $\alpha\beta$  T Cell Lineages. *J IMMUNOL*  
546 **209**:938-949. doi:10.4049/jimmunol.2001441  
547 Chen D, Camponeschi A, Nordlund J, Marincevic-Zuniga Y, Abrahamsson J, Lönnerholm G,  
548 Fogelstrand L, Mårtensson IL. 2021. RAG1 co-expression signature identifies ETV6-RUNX1-like B-  
549 cell precursor acute lymphoblastic leukemia in children. *Cancer Med* **10**:3997-4003.  
550 doi:10.1002/cam4.3928  
551 Curry JD, Schlissel MS. 2008. RAG2's non-core domain contributes to the ordered regulation of V(D)J  
552 recombination. *NUCLEIC ACIDS RES* **36**:5750-5762. doi:10.1093/nar/gkn553  
553 Deng Z, Liu H, Liu X. 2015. RAG1-mediated ubiquitylation of histone H3 is required for chromosomal  
554 V(D)J recombination. *CELL RES* **25**:181-192. doi:10.1038/cr.2015.1  
555 Eastman QM, Leu TM, Schatz DG. 1996. Initiation of V(D)J recombination in vitro obeying the 12/23  
556 rule. *NATURE* **380**:85-88. doi:10.1038/380085a0  
557 Fatma H, Maurya SK, Siddique HR. 2022. Epigenetic modifications of c-MYC: Role in cancer cell  
558 reprogramming, progression and chemoresistance. *SEMIN CANCER BIOL* **83**:166-176.  
559 doi:10.1016/j.semcancer.2020.11.008  
560 Fugmann SD, Lee AI, Shockett PE, Villey IJ, Schatz DG. 2000. The RAG proteins and V(D)J recom-  
561 bination: complexes, ends, and transposition. *ANNU REV IMMUNOL* **18**:495-527.  
562 doi:10.1146/annurev.immunol.18.1.495  
563 Gan T, Wang Y, Liu Y, Schatz DG, Hu J. 2021. RAG2 abolishes RAG1 aggregation to facilitate V(D)J  
564 recombination. *CELL REP* **37**:109824. doi:10.1016/j.celrep.2021.109824  
565 Gaymes TJ, North PS, Brady N, Hickson ID, Mufti GJ, Rassool FV. 2002. Increased error-prone non  
566 homologous DNA end-joining--a proposed mechanism of chromosomal instability in Bloom's syn-  
567 drome. *ONCOGENE* **21**:2525-2533. doi:10.1038/sj.onc.1205331

- 568 Goel S, Bhatia V, Biswas T, Ateeq B. 2022. Epigenetic reprogramming during prostate cancer progres-  
569 sion: A perspective from development. *SEMIN CANCER BIOL* **83**:136-151.  
570 doi:10.1016/j.semcancer.2021.01.009
- 571 Hardy RR, Hayakawa K. 2001. B cell development pathways. *ANNU REV IMMUNOL* **19**:595-621.  
572 doi:10.1146/annurev.immunol.19.1.595
- 573 Hirokawa S, Chure G, Belliveau NM, Lovely GA, Anaya M, Schatz DG, Baltimore D, Phillips R. 2020.  
574 Sequence-dependent dynamics of synthetic and endogenous RSSs in V(D)J recombination. *NUCLEIC*  
575 *ACIDS RES* **48**:6726-6739. doi:10.1093/nar/gkaa418
- 576 Khoshchehreh R, Totonchi M, Carlos RJ, Torres R, Baharvand H, Aicher A, Ebrahimi M, Heesch C.  
577 2019. Epigenetic reprogramming of primary pancreatic cancer cells counteracts their in vivo  
578 tumorigenicity. *ONCOGENE* **38**:6226-6239. doi:10.1038/s41388-019-0871-x
- 579 Kumari R, Roy U, Desai S, Nilavar NM, Van Nieuwenhuijze A, Paranjape A, Radha G, Bawa P,  
580 Srivastava M, Nambiar M, Balaji KN, Liston A, Choudhary B, Raghavan SC. 2021. MicroRNA miR-  
581 29c regulates RAG1 expression and modulates V(D)J recombination during B cell development. *CELL*  
582 *REP* **36**:109390. doi:10.1016/j.celrep.2021.109390
- 583 Lewis SM, Agard E, Suh S, Czyzyk L. 1997. Cryptic signals and the fidelity of V(D)J joining. *MOL*  
584 *CELL BIOL* **17**:3125-3136. doi:10.1128/MCB.17.6.3125
- 585 Libri A, Marton T, Deriano L. 2021. The (Lack of) DNA Double-Strand Break Repair Pathway Choice  
586 During V(D)J Recombination. *FRONT GENET* **12**:823943. doi:10.3389/fgene.2021.823943
- 587 Liu C, Zhang Y, Liu CC, Schatz DG. 2022. Structural insights into the evolution of the RAG  
588 recombinase. *NAT REV IMMUNOL* **22**:353-370. doi:10.1038/s41577-021-00628-6
- 589 Liu C, Zhang Y, Liu CC, Schatz DG. 2022. Structural insights into the evolution of the RAG  
590 recombinase. *NAT REV IMMUNOL* **22**:353-370. doi:10.1038/s41577-021-00628-6
- 591 Liu Y, Subrahmanyam R, Chakraborty T, Sen R, Desiderio S. 2007. A plant homeodomain in RAG-2  
592 that binds Hypermethylated lysine 4 of histone H3 is necessary for efficient antigen-receptor-gene rear-  
593 rangement. *IMMUNITY* **27**:561-571. doi:10.1016/j.immuni.2007.09.005
- 594 Lu C, Ward A, Bettridge J, Liu Y, Desiderio S. 2015. An autoregulatory mechanism imposes allosteric  
595 control on the V(D)J recombinase by histone H3 methylation. *CELL REP* **10**:29-38.  
596 doi:10.1016/j.celrep.2014.12.001
- 597 Matthews AG, Kuo AJ, Ramón-Maiques S, Han S, Champagne KS, Ivanov D, Gallardo M, Carney D,  
598 Cheung P, Ciccone DN, Walter KL, Utz PJ, Shi Y, Kutateladze TG, Yang W, Gozani O, Oettinger MA.  
599 2007. RAG2 PHD finger couples histone H3 lysine 4 trimethylation with V(D)J recombination. *NA-*  
600 *TURE* **450**:1106-1110. doi:10.1038/nature06431
- 601 Mendes RD, Sarmiento LM, Canté-Barrett K, Zuurbier L, Buijs-Gladdines JG, Póvoa V, Smits WK,  
602 Abecasis M, Yunes JA, Sonneveld E, Horstmann MA, Pieters R, Barata JT, Meijerink JP. 2014. PTEN  
603 microdeletions in T-cell acute lymphoblastic leukemia are caused by illegitimate RAG-mediated re-  
604 combination events. *BLOOD* **124**:567-578. doi:10.1182/blood-2014-03-562751
- 605 Mijušković M, Chou YF, Gigi V, Lindsay CR, Shestova O, Lewis SM, Roth DB. 2015. Off-Target  
606 V(D)J Recombination Drives Lymphomagenesis and Is Escalated by Loss of the Rag2 C Terminus.  
607 *CELL REP* **12**:1842-1852. doi:10.1016/j.celrep.2015.08.034
- 608 Mori H, Colman SM, Xiao Z, Ford AM, Healy LE, Donaldson C, Hows JM, Navarrete C, Greaves M.  
609 2002. Chromosome translocations and covert leukemic clones are generated during normal fetal devel-  
610 opment. *Proc Natl Acad Sci U S A* **99**:8242-8247. doi:10.1073/pnas.112218799
- 611 Onozawa M, Aplan PD. 2012. Illegitimate V(D)J recombination involving nonantigen receptor loci in

- 612 lymphoid malignancy. *Genes Chromosomes Cancer* **51**:525-535. doi:10.1002/gcc.21942
- 613 Papaemmanuil E, Rapado I, Li Y, Potter NE, Wedge DC, Tubio J, Alexandrov LB, Van Loo P, Cooke  
614 SL, Marshall J, Martincorena I, Hinton J, Gundem G, van Delft FW, Nik-Zainal S, Jones DR, Rama-  
615 krishna M, Tittley I, Stebbings L, Leroy C, Menzies A, Gamble J, Robinson B, Mudie L, Raine K,  
616 O'Meara S, Teague JW, Butler AP, Cazzaniga G, Biondi A, Zuna J, Kempinski H, Muschen M, Ford AM,  
617 Stratton MR, Greaves M, Campbell PJ. 2014. RAG-mediated recombination is the predominant driver  
618 of oncogenic rearrangement in ETV6-RUNX1 acute lymphoblastic leukemia. *NAT GENET* **46**:116-125.  
619 doi:10.1038/ng.2874
- 620 Raghavan SC, Tong J, Lieber MR. 2006. Hybrid joint formation in human V(D)J recombination re-  
621 quires nonhomologous DNA end joining. *DNA Repair (Amst)* **5**:278-285.  
622 doi:10.1016/j.dnarep.2005.09.008
- 623 Rassool FV. 2003. DNA double strand breaks (DSB) and non-homologous end joining (NHEJ) path-  
624 ways in human leukemia. *CANCER LETT* **193**:1-9. doi:10.1016/s0304-3835(02)00692-4
- 625 Repasky JA, Corbett E, Boboila C, Schatz DG. 2004. Mutational analysis of terminal  
626 deoxynucleotidyltransferase-mediated N-nucleotide addition in V(D)J recombination. *J IMMUNOL*  
627 **172**:5478-5488. doi:10.4049/jimmunol.172.9.5478
- 628 Rooney S, Chaudhuri J, Alt FW. 2004. The role of the non-homologous end-joining pathway in lym-  
629 phocyte development. *IMMUNOL REV* **200**:115-131. doi:10.1111/j.0105-2896.2004.00165.x
- 630 Sadofsky MJ, Hesse JE, McBlane JF, Gellert M. 1993. Expression and V(D)J recombination activity of  
631 mutated RAG-1 proteins. *NUCLEIC ACIDS RES* **21**:5644-5650. doi:10.1093/nar/21.24.5644
- 632 Schabla NM, Perry GA, Palmer VL, Swanson PC. 2018. VprBP (DCAF1) Regulates RAG1 Expression  
633 Independently of Dicer by Mediating RAG1 Degradation. *J IMMUNOL* **201**:930-939.  
634 doi:10.4049/jimmunol.1800054
- 635 Schatz DG, Ji Y. 2011. Recombination centres and the orchestration of V(D)J recombination. *NAT*  
636 *REV IMMUNOL* **11**:251-263. doi:10.1038/nri2941
- 637 Schatz DG, Swanson PC. 2011. V(D)J recombination: mechanisms of initiation. *ANNU REV GENET*  
638 **45**:167-202. doi:10.1146/annurev-genet-110410-132552
- 639 Schjerven H, Ayongaba EF, Aghajani A, McLaughlin J, Cheng D, Geng H, Boyd JR, Eggesbø  
640 LM, Lindeman I, Heath JL, Park E, Witte ON, Smale ST, Frietze S, Müschen M. 2017. Genetic analy-  
641 sis of Ikaros target genes and tumor suppressor function in BCR-ABL1(+) pre-B ALL. *J EXP MED*  
642 **214**:793-814. doi:10.1084/jem.20160049
- 643 Schlissel MS, Corcoran LM, Baltimore D. 1991. Virus-transformed pre-B cells show ordered activa-  
644 tion but not inactivation of immunoglobulin gene rearrangement and transcription. *J EXP MED*  
645 **173**:711-720. doi:10.1084/jem.173.3.711
- 646 Scully R, Panday A, Elango R, Willis NA. 2019. DNA double-strand break repair-pathway choice in  
647 somatic mammalian cells. *Nat Rev Mol Cell Biol* **20**:698-714. doi:10.1038/s41580-019-0152-0
- 648 Sekiguchi JA, Whitlow S, Alt FW. 2001. Increased accumulation of hybrid V(D)J joins in cells ex-  
649 pressing truncated versus full-length RAGs. *MOL CELL* **8**:1383-1390. doi:10.1016/s1097-  
650 2765(01)00423-3
- 651 Shi B, Dong X, Ma Q, Sun S, Ma L, Yu J, Wang X, Pan J, He X, Su D, Yao X. 2020. The Usage of  
652 Human IGHJ Genes Follows a Particular Non-random Selection: The Recombination Signal Sequence  
653 May Affect the Usage of Human IGHJ Genes. *FRONT GENET* **11**:524413.  
654 doi:10.3389/fgene.2020.524413
- 655 Silver DP, Spanopoulou E, Mulligan RC, Baltimore D. 1993. Dispensable sequence motifs in the

656 RAG-1 and RAG-2 genes for plasmid V(D)J recombination. *Proc Natl Acad Sci U S A* **90**:6100-6104.  
657 doi:10.1073/pnas.90.13.6100

658 Talukder SR, Dudley DD, Alt FW, Takahama Y, Akamatsu Y. 2004. Increased frequency of aberrant  
659 V(D)J recombination products in core RAG-expressing mice. *NUCLEIC ACIDS RES* **32**:4539-4549.  
660 doi:10.1093/nar/gkh778

661 Teng G, Maman Y, Resch W, Kim M, Yamane A, Qian J, Kieffer-Kwon KR, Mandal M, Ji Y, Meffre  
662 E, Clark MR, Cowell LG, Casellas R, Schatz DG. 2015. RAG Represents a Widespread Threat to the  
663 Lymphocyte Genome. *CELL* **162**:751-765. doi:10.1016/j.cell.2015.07.009

664 Thomson DW, Shahrin NH, Wang P, Wadham C, Shanmuganathan N, Scott HS, Dinger ME, Hughes  
665 TP, Schreiber AW, Branford S. 2020. Aberrant RAG-mediated recombination contributes to multiple  
666 structural rearrangements in lymphoid blast crisis of chronic myeloid leukemia. *LEUKEMIA* **34**:2051-  
667 2063. doi:10.1038/s41375-020-0751-y

668 Wiegmans AP, Ward A, Ivanova E, Duijf P, Adams MN, Najib IM, Van Oosterhout R, Sadowski MC,  
669 Kelly G, Morrical SW, O'Byrne K, Lee JS, Richard DJ. 2021. Genome instability and pressure on non-  
670 homologous end joining drives chemotherapy resistance via a DNA repair crisis switch in triple nega-  
671 tive breast cancer. *NAR Cancer* **3**:b22. doi:10.1093/narcan/zcab022

672 Wong S, Witte ON. 2004. The BCR-ABL story: bench to bedside and back. *ANNU REV IMMUNOL*  
673 **22**:247-306. doi:10.1146/annurev.immunol.22.012703.104753

674 Yu X, Zhang H, Yuan M, Zhang P, Wang Y, Zheng M, Lv Z, Odhiambo WO, Li C, Liu C, Ma Y, Ji Y.  
675 2019. Identification and characterization of a murine model of BCR-ABL1+ acute B-lymphoblastic  
676 leukemia with central nervous system metastasis. *ONCOL REP* **42**:521-532. doi:10.3892/or.2019.7184

677 Yuan M, Wang Y, Qin M, Zhao X, Chen X, Li D, Miao Y, Otieno OW, Liu H, Ma Y, Ji Y. 2021. RAG  
678 enhances BCR-ABL1-positive leukemic cell growth through its endonuclease activity in vitro and in  
679 vivo. *CANCER SCI* **112**:2679-2691. doi:10.1111/cas.14939

680 Zhang L, Reynolds TL, Shan X, Desiderio S. 2011. Coupling of V(D)J recombination to the cell cycle  
681 suppresses genomic instability and lymphoid tumorigenesis. *IMMUNITY* **34**:163-174.  
682 doi:10.1016/j.immuni.2011.02.003

683



A

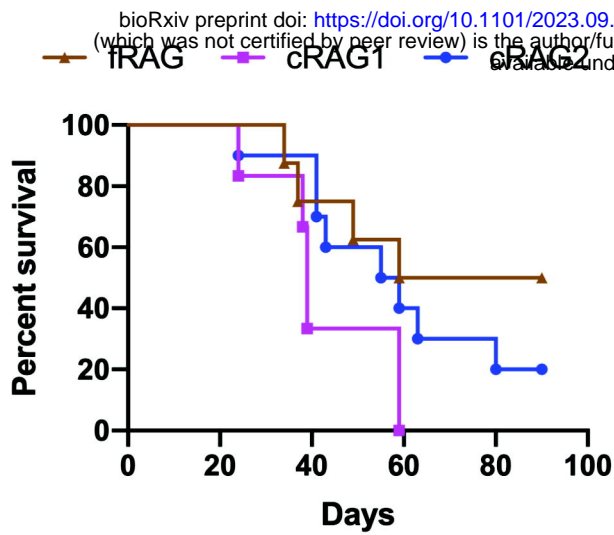

B

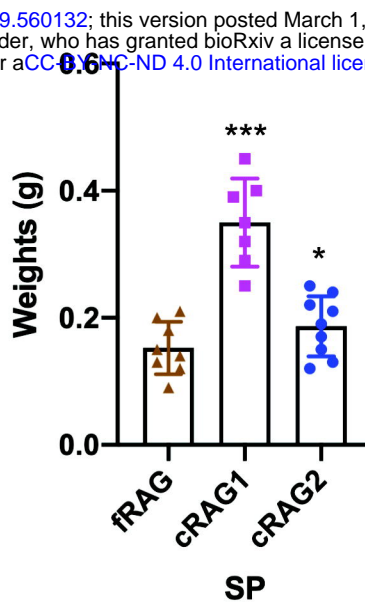

C

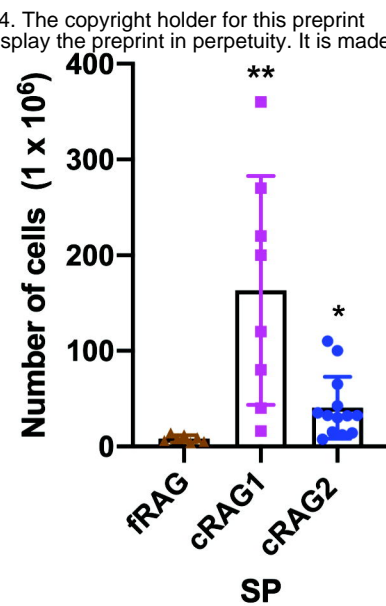

D

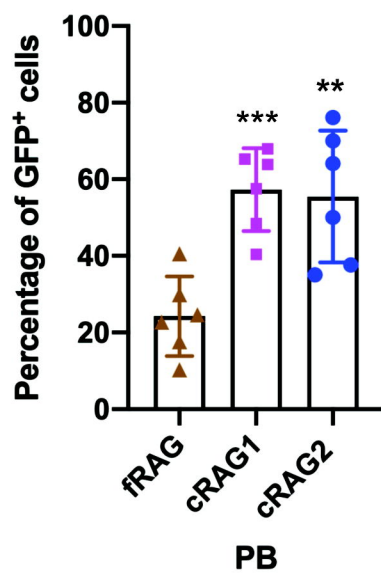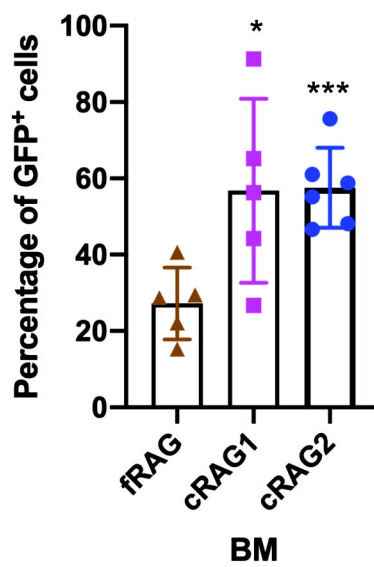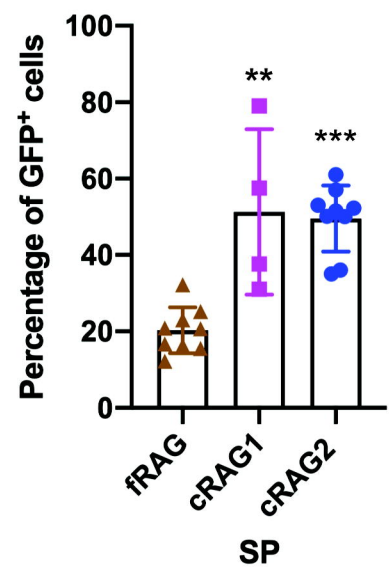

E

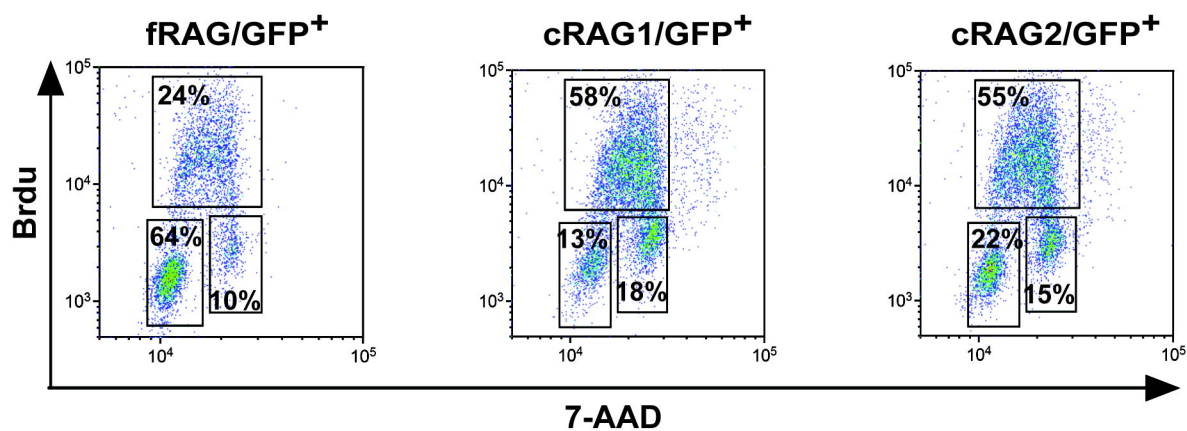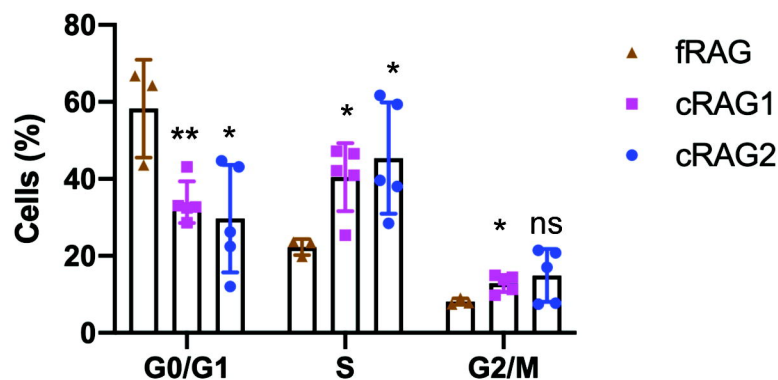

Figure 1

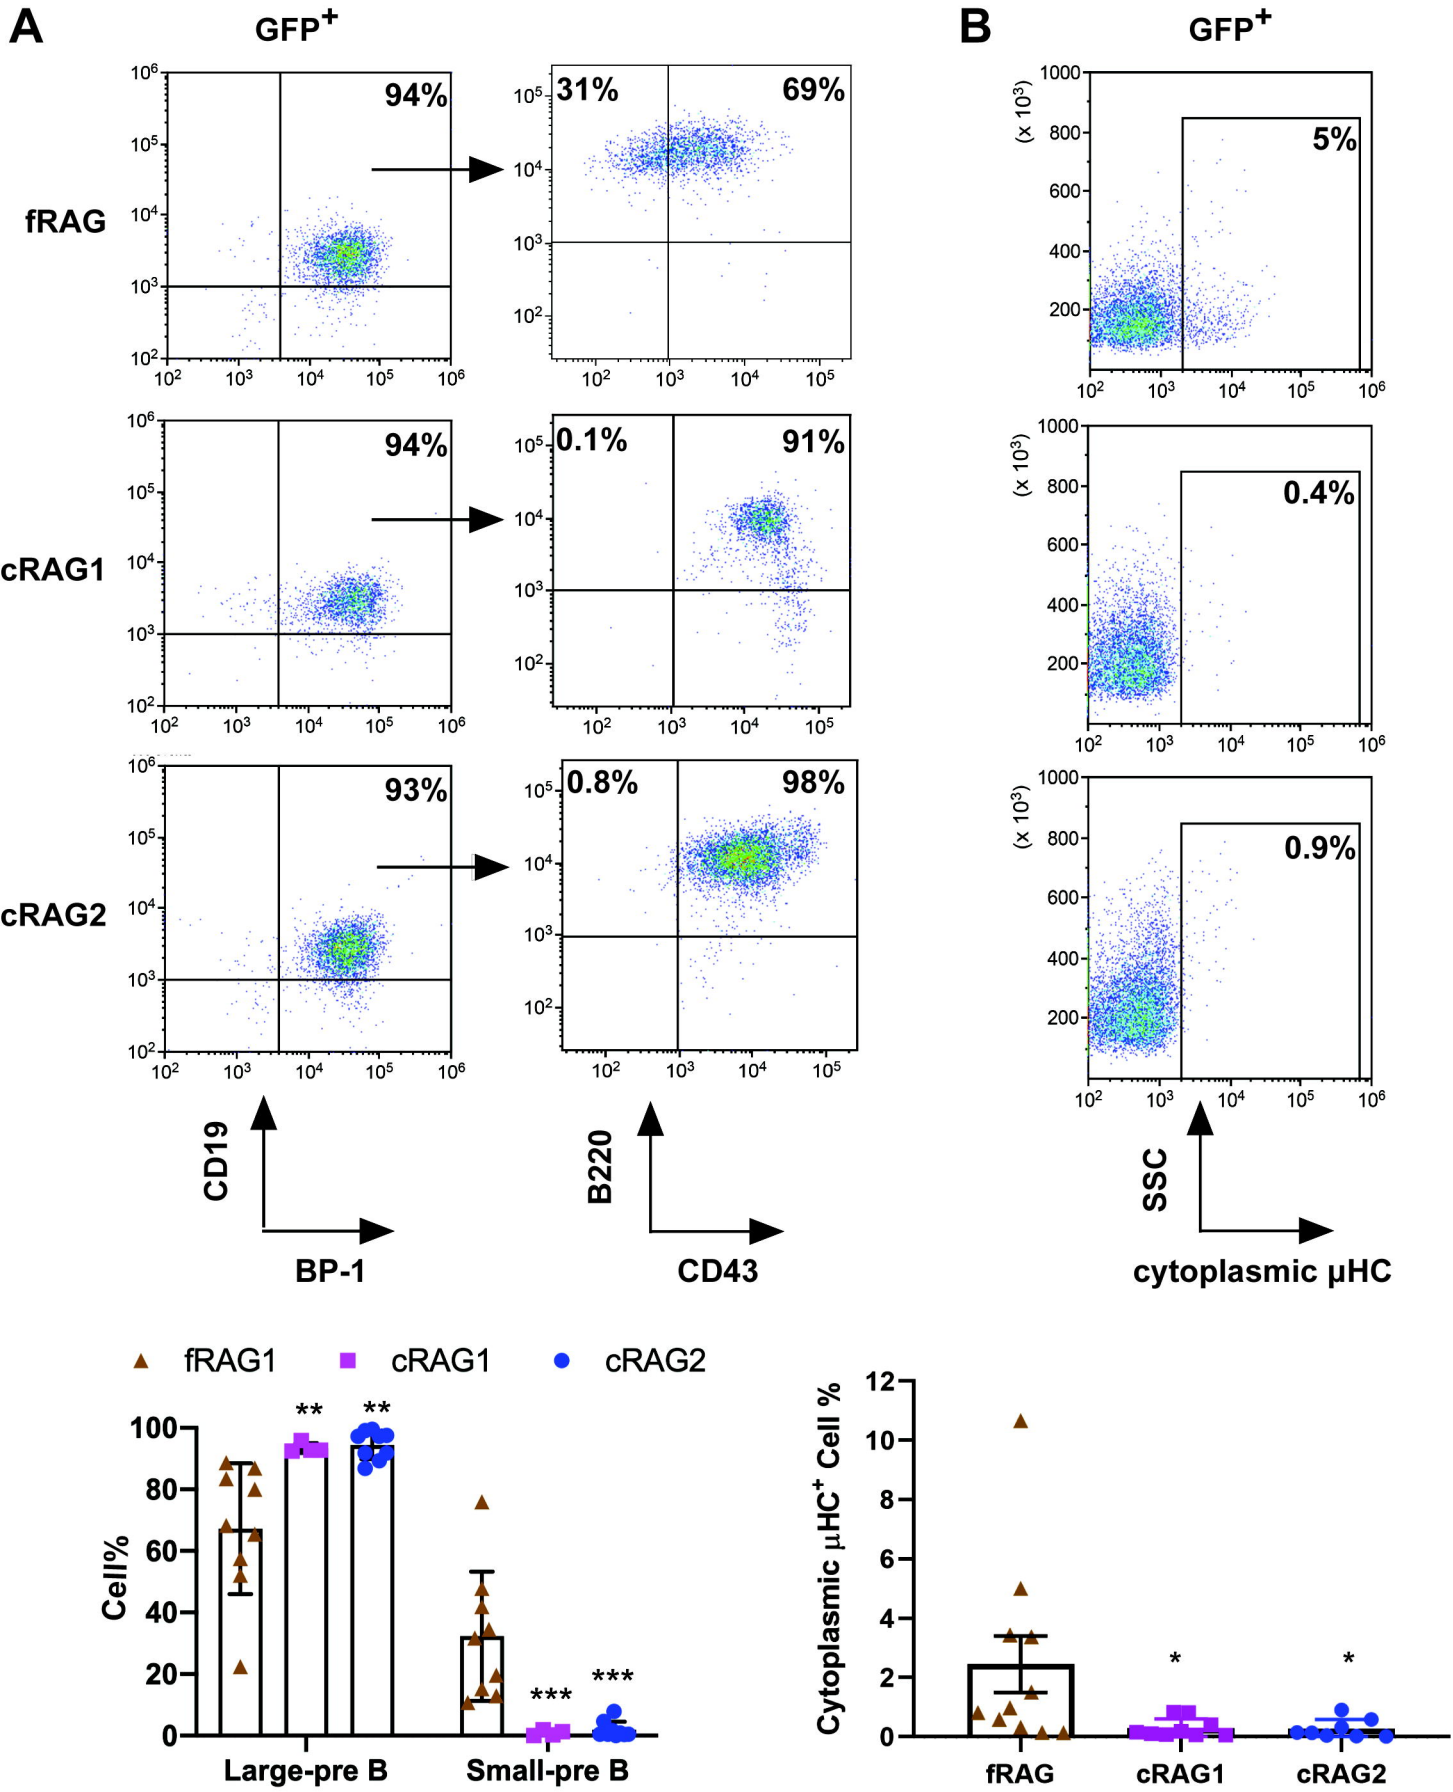

Figure 2

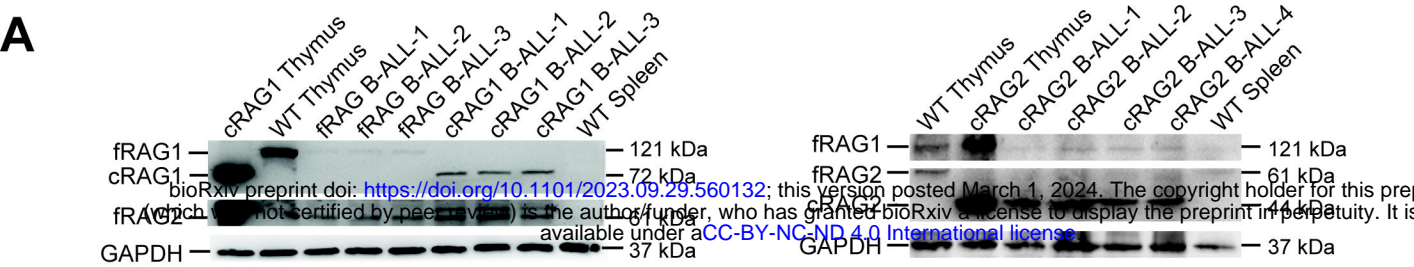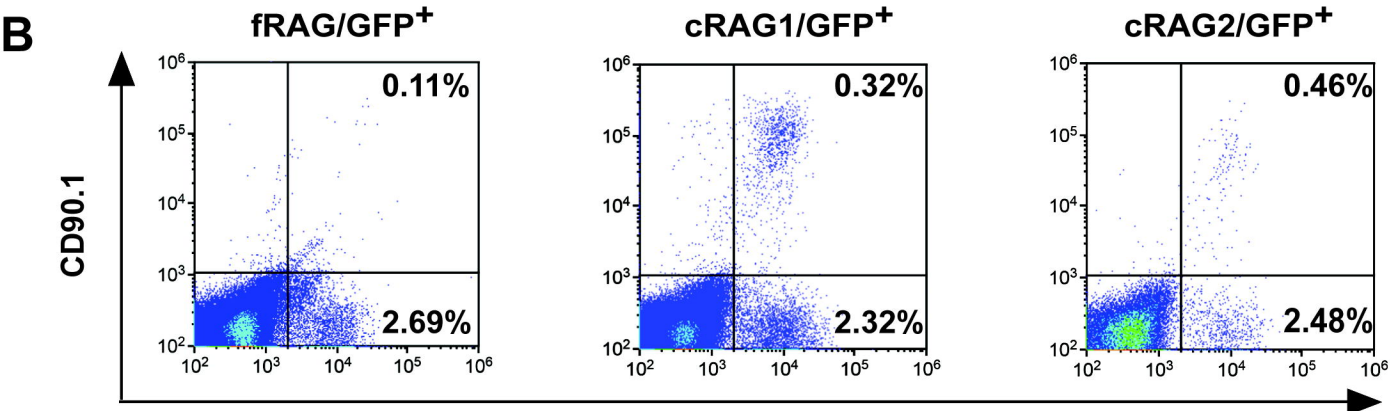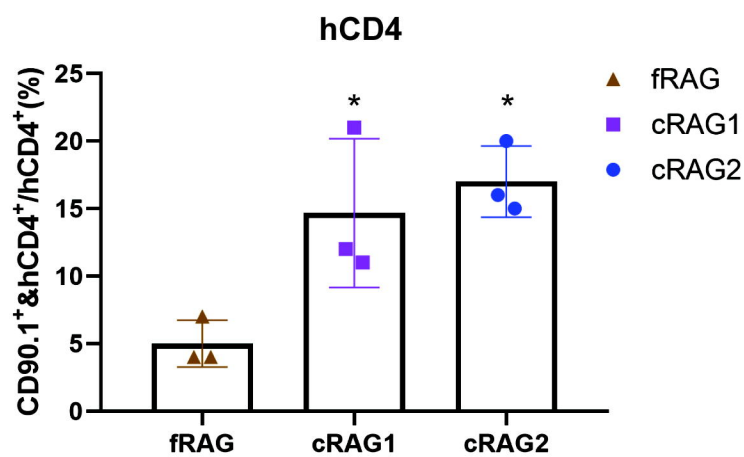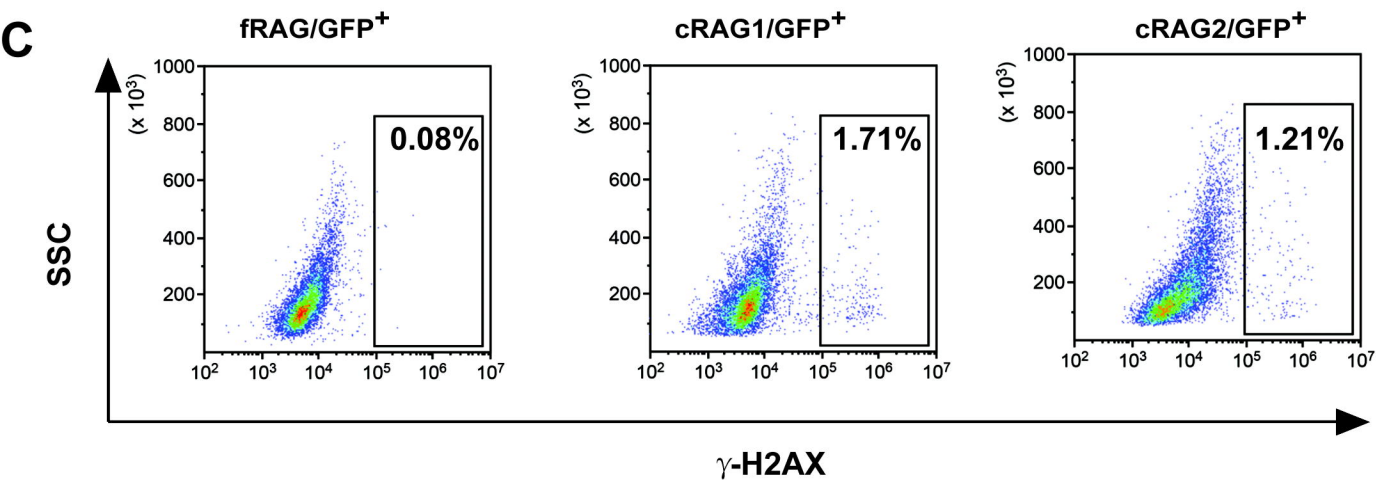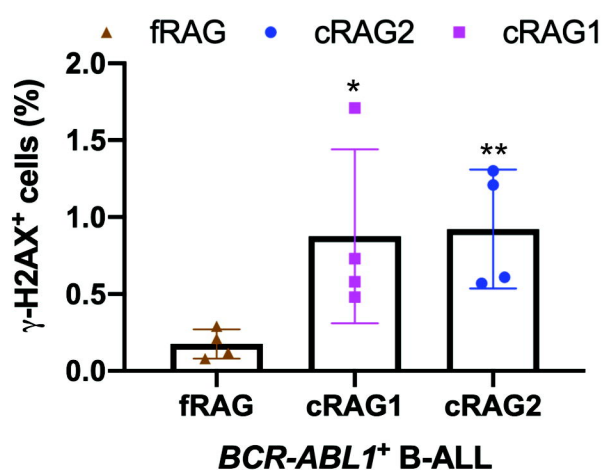

Figure 3

**A**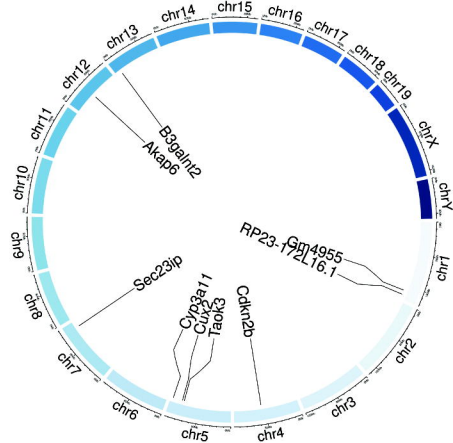**cRAG1 B-ALL-3F**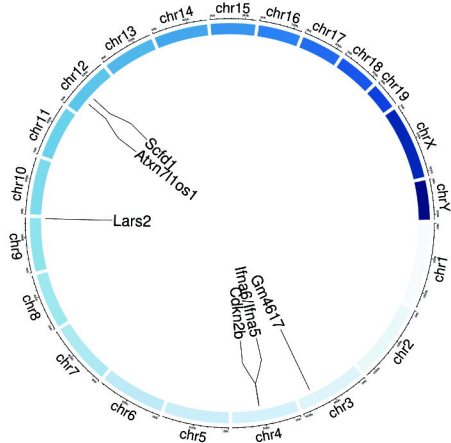**cRAG1 B-ALL-6F****B**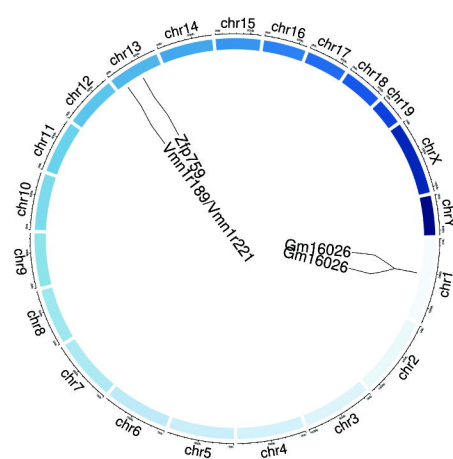**cRAG2 B-ALL-3F**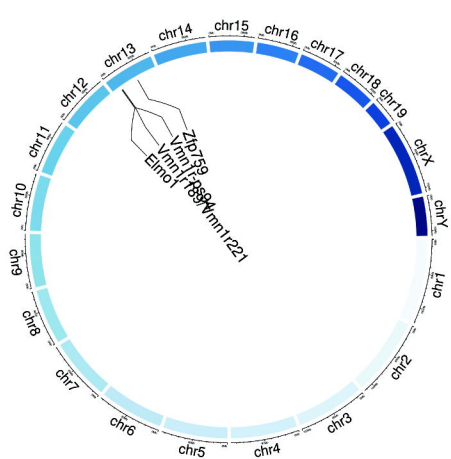**cRAG2 B-ALL-6F**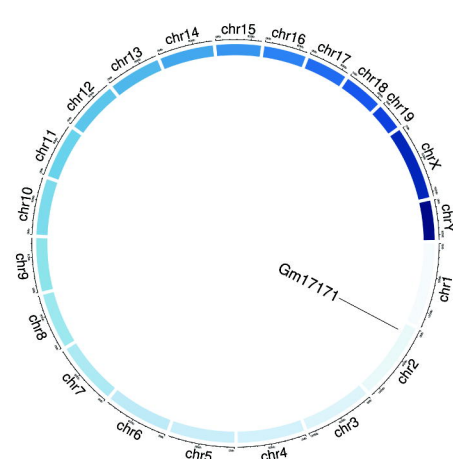**cRAG2 B-ALL-10F****C**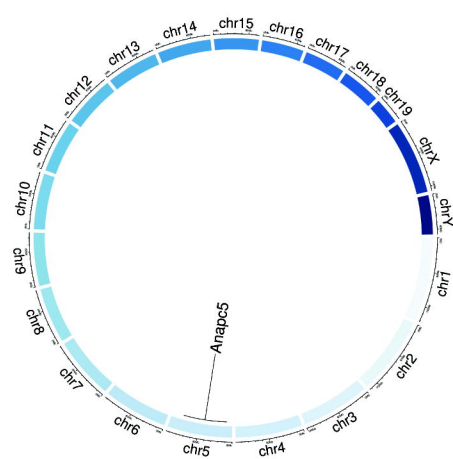**fRAG B-ALL-1F**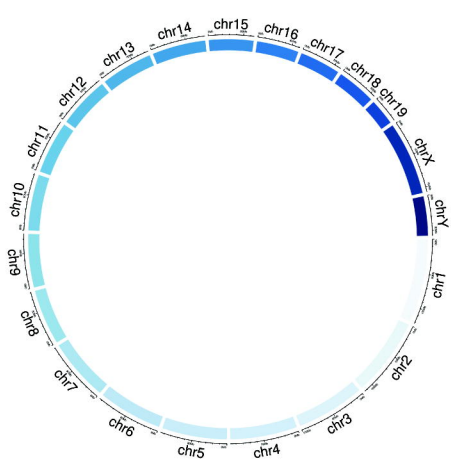**fRAG B-ALL-11F****Figure 4**

**A**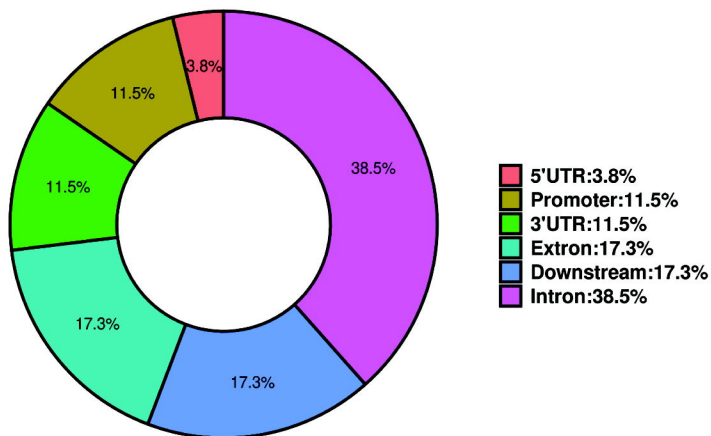**B**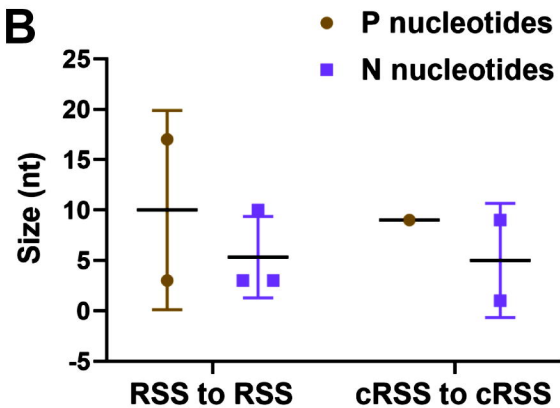

|                                    | RSS to RSS | cRSS to cRSS |
|------------------------------------|------------|--------------|
| <b>P nucleotides (mean length)</b> | 10         | 9            |
| <b>Incidence</b>                   | 2/6        | 1/23         |
| <b>N nucleotides (mean length)</b> | 4          | 5            |
| <b>Incidence</b>                   |            |              |

**C**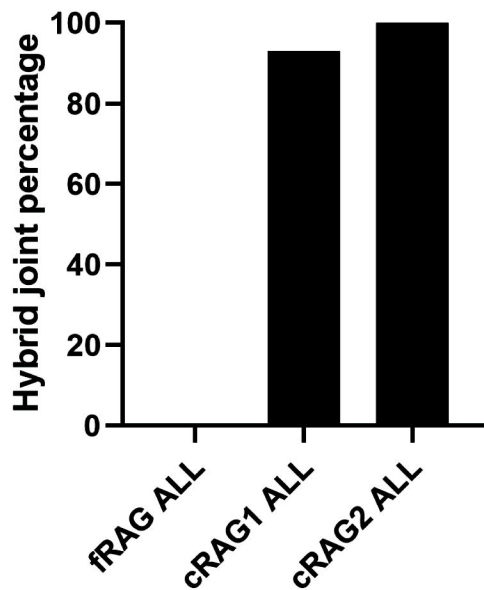**D**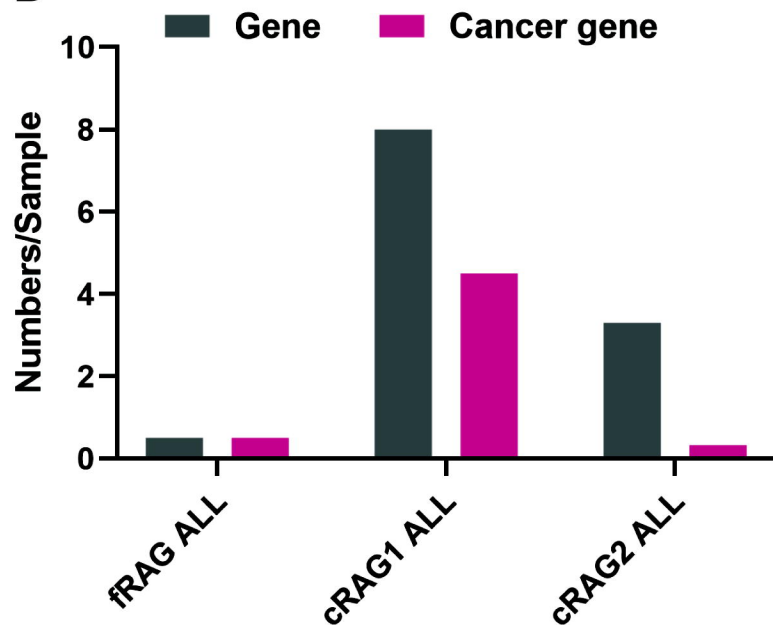

Figure 5

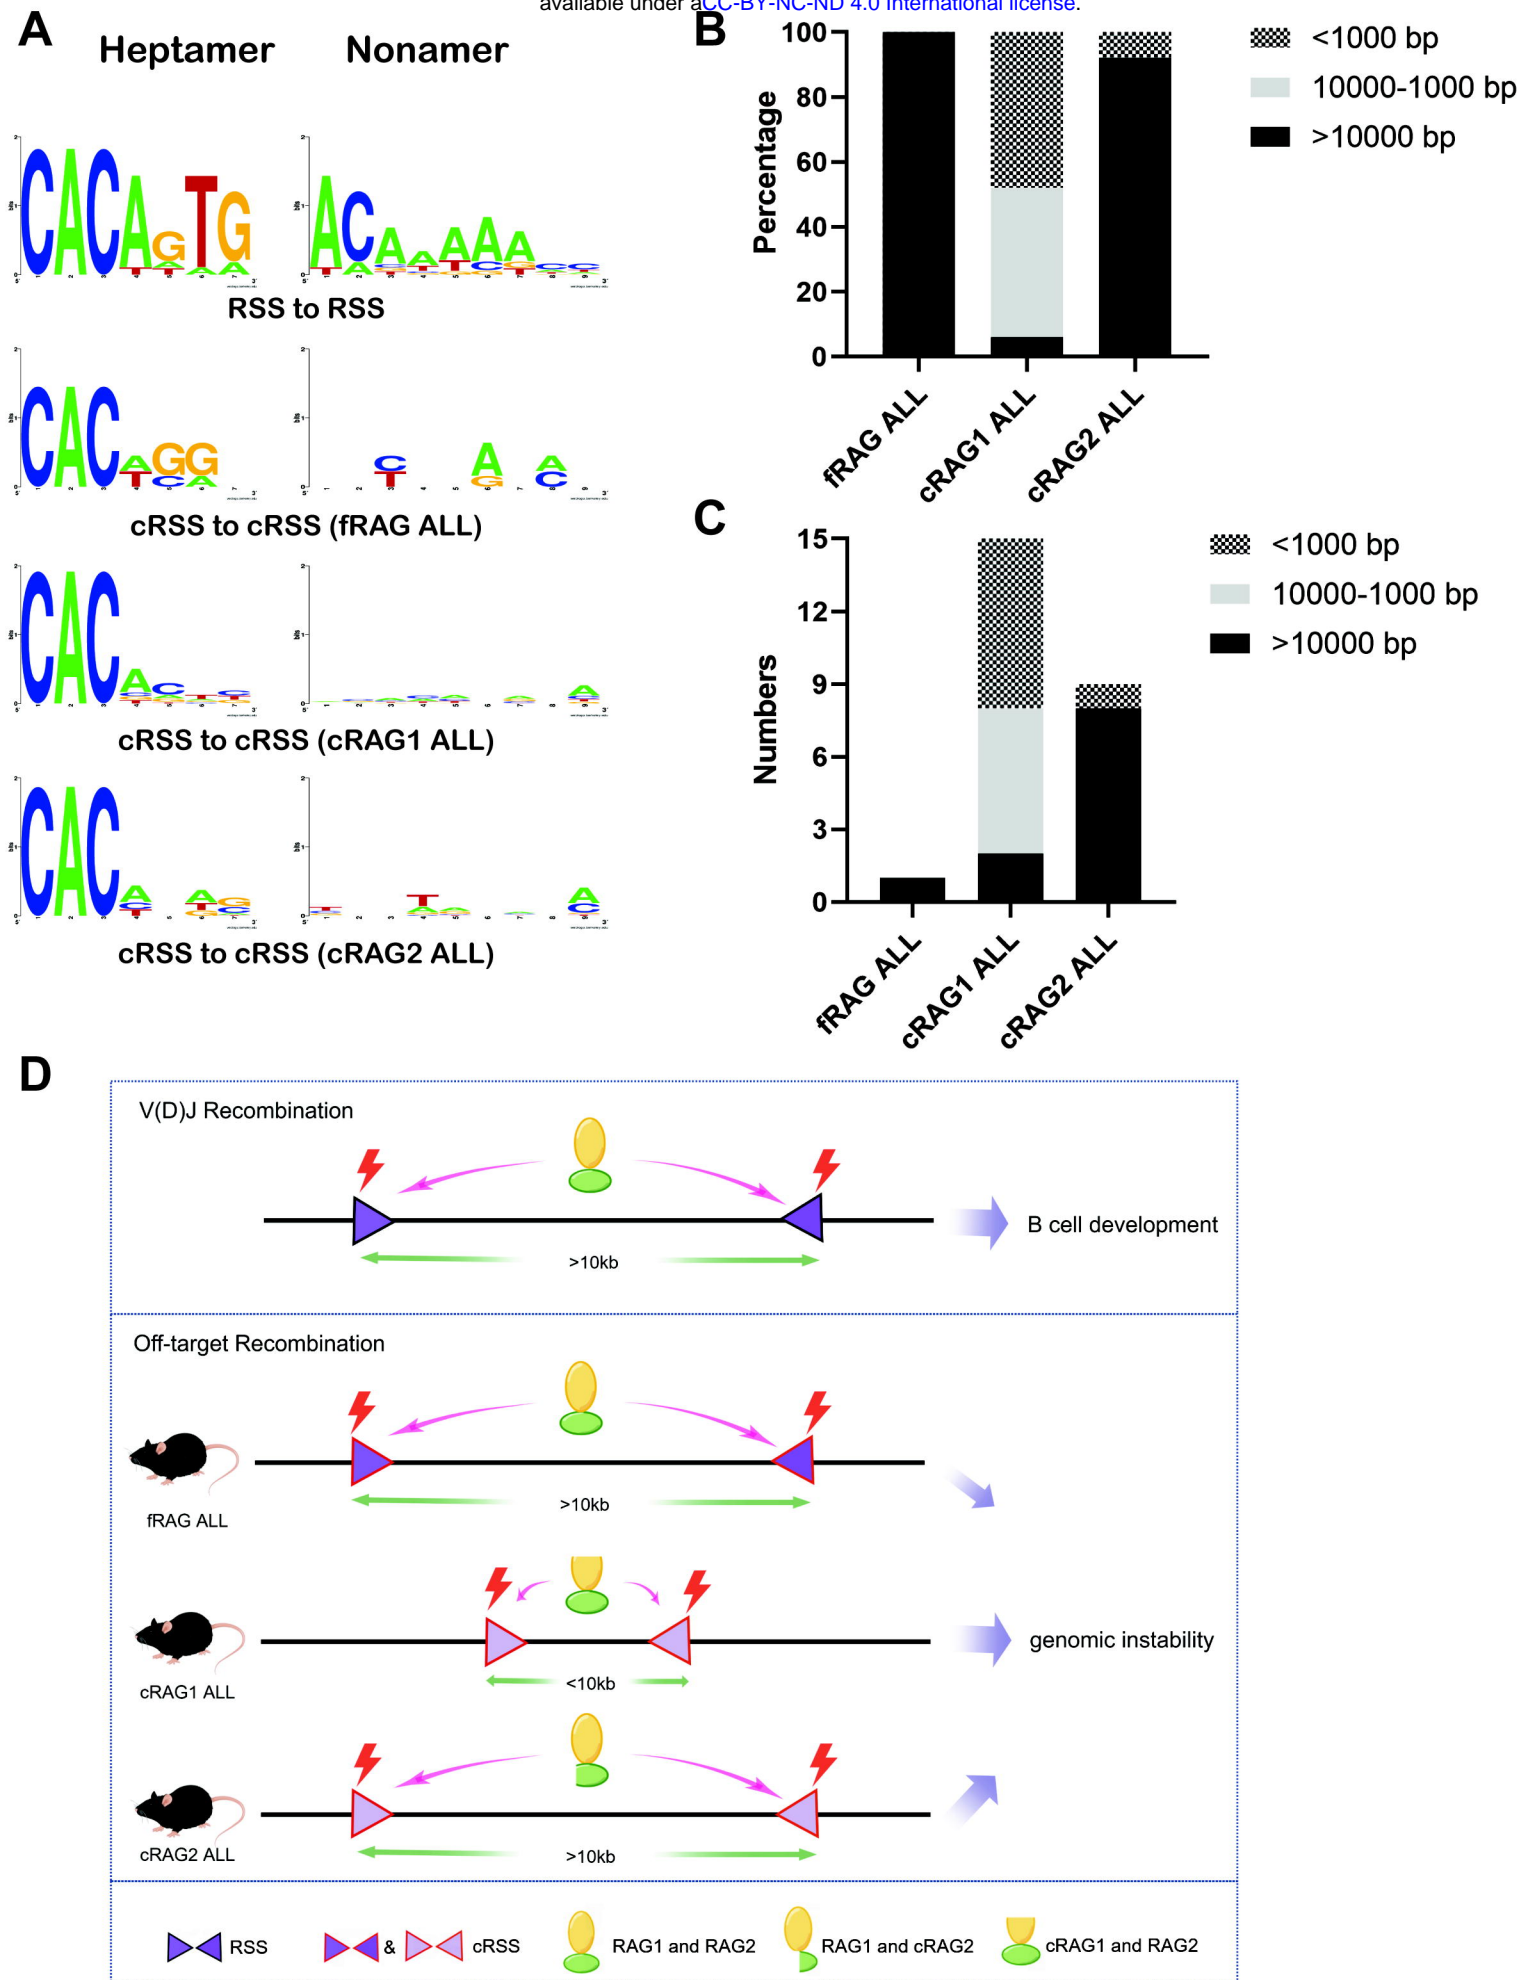

Figure 6
